# Supplementary material
Source: PubMed Central journal article supplement (PMC11113467)
Supplement: 18_2013_1461_MOESM1_ESM.pdf [file 18_2013_1461_MOESM1_ESM.pdf]

**Supplementary Table 1.** Statistical comparison of functional affinities (KA) calculated from cyclase and internalization responses by different DOR agonists

|               | cAMP inhibition  | Internalization |                  |                       |
|---------------|------------------|-----------------|------------------|-----------------------|
|               | log KA $\pm$ SEM |                 | log KA $\pm$ SEM | p values <sup>†</sup> |
| SNC-80 (n=9)  | -6.58 $\pm$ 0.53 | SNC-80 (n=12)   | -4.28 $\pm$ 0.33 | < 0.001               |
| DPDPE (n=8)   | -6.38 $\pm$ 0.13 | DPDPE (n=11)    | -6.12 $\pm$ 0.11 | ns                    |
| UFP-512 (n=7) | -8.82 $\pm$ 0.18 | UFP-512 (n=10)  | -6.85 $\pm$ 0.23 | < 0.001               |
| TIPP (n=6)    | -9.51 $\pm$ 0.46 | TIPP (n=9)      | -7.84 $\pm$ 0.33 | < 0.01                |

<sup>†</sup> KA values were compared by means of two-way ANOVA. Analysis revealed an effect of drug ( $p < 0.0001$ ), an effect of response ( $p < 0.0001$ ) and an interaction ( $p < 0.05$ ). p values shown in the table correspond to subsequent comparisons by means of Bonferroni post-hoc tests.

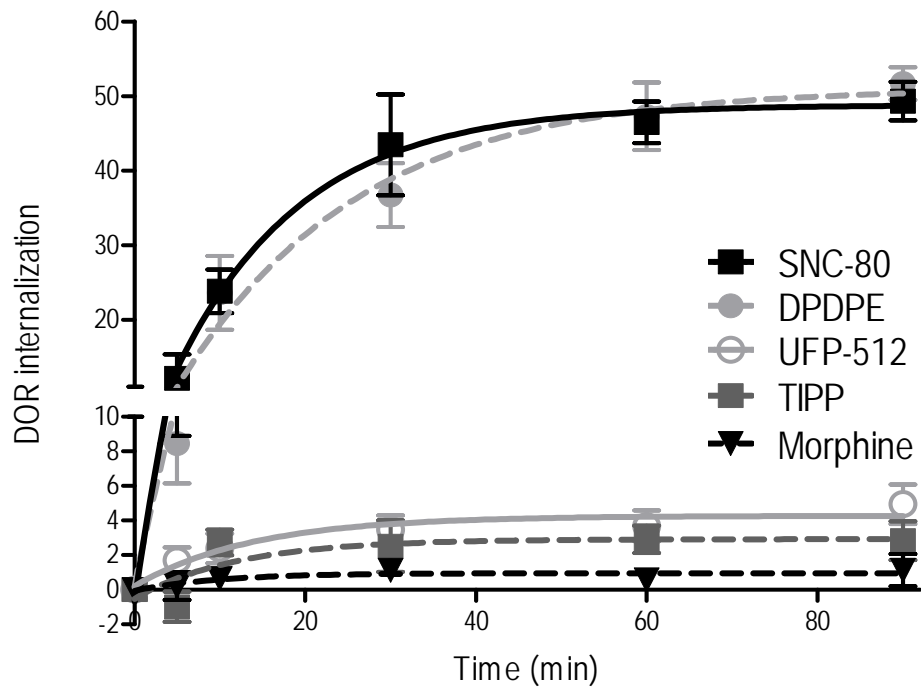

Supplementary Figure 1

A

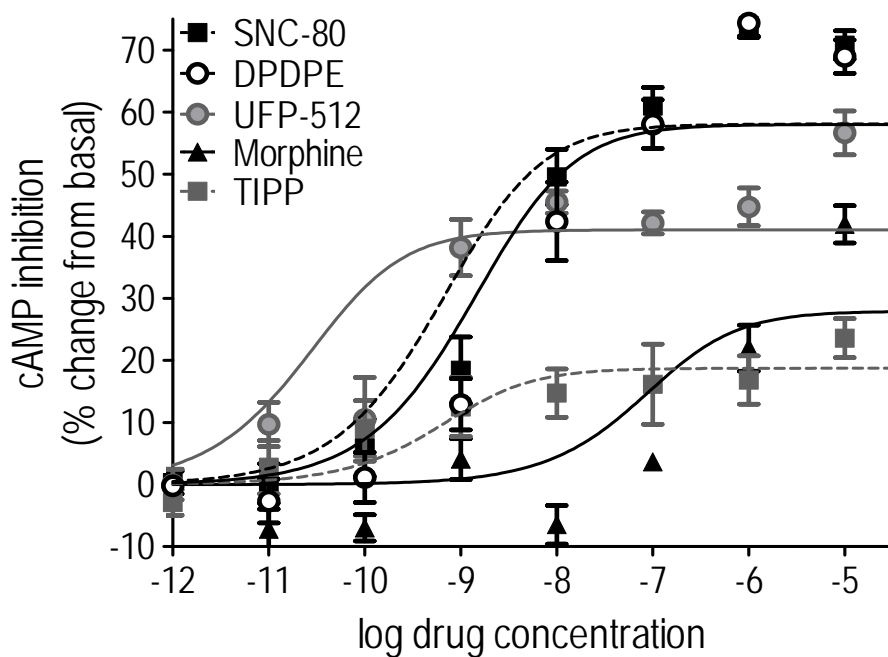

B

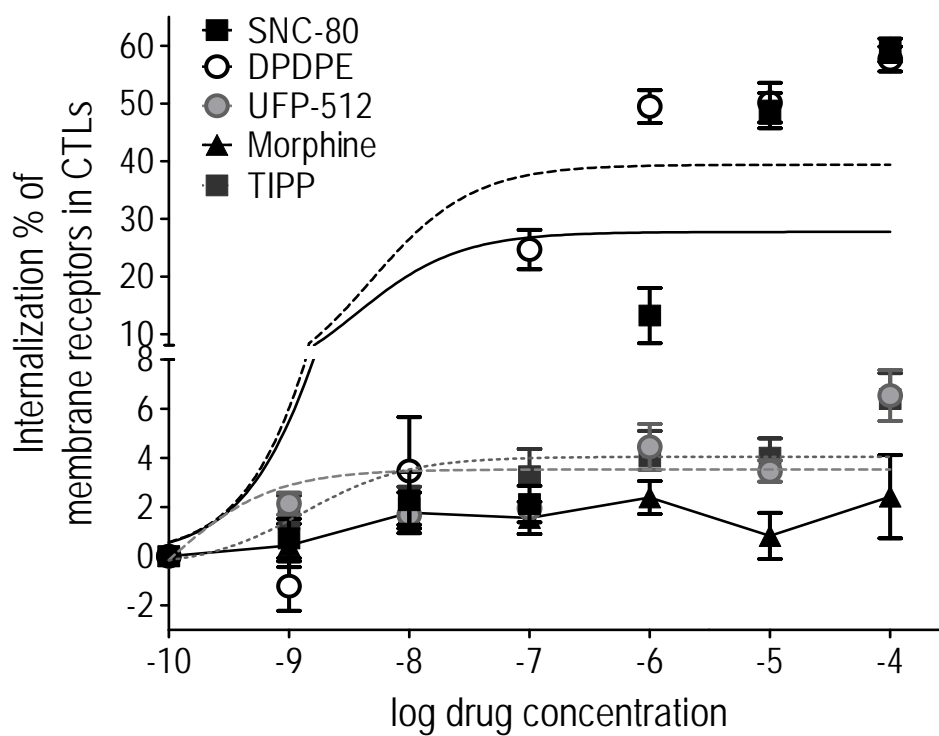

Supplementary figure 2
